# Supplementary material for: Coastal HF radars in the Mediterranean: status of operations and a framework for future development
Source: Copernicus journal article supplement (doi:10.5194/os-2021-119), 2021-12-14
Supplement: Supplementary file [file os-2021-119-AC1-supplement.pdf]

## REVIEWER #1:

### GENERAL COMMENTS

**The paper provides a good overview of High Frequency radar and how it can be used to answer scientific and societal questions related to the coastal ocean. They then discuss the measurements of HFR (currents, waves and winds). They then document the long list of projects that have contributed to the development of HFR in the Mediterranean. Lastly, they lay out the future challenges and prospects for HFR technology in the region.**

Many thanks to the anonymous reviewer for the number of useful comments that will help to significantly improve the quality of the final version of this manuscript. Please find below detailed answers to each comment.

### SPECIFIC COMMENTS

**I would like to hear from the authors on how HFR compares to other measurements in the Mediterranean in terms of priority and significance. Also, can the authors document more “happy ending stories” line 957. Can they explain more on SASEMAR? Are there other stories like this one?**

We have added the following paragraph at the end of section 4:

*“While the implementation of a fully operational HFR regional network in the Mediterranean Sea is still in progress, other observational networks have reached a very mature stage in terms of number of permanent devices, length of recorded time series and consistency of the quality-control protocols adopted. According to Tintoré et al. (2019), there are 58 buoys capable of measuring waves (most of which are directional), 100 sea level stations, 37 operational current meters, 113 stations monitoring the sea water temperature, 50 salinity stations and 78 Argo-floats in the Mediterranean Sea. In terms of priority and significance, the HFR network might be considered as a useful ancillary tool that complement in-situ platforms, which nowadays constitute a sound monitoring core in this region. Special emphasis has been recently placed on other emerging technologies, such as glider facilities or biogeochemical Argo floats, thanks to their ability to monitor the three-dimensional water column. However, they are not as broadly used as HFRs and the level of operational implementation still remains in a preliminary research phase.”*

Regarding the “happy-ending stories”, we have not documented any other story apart from the one related to SASEMAR. We are currently involved in the development of an HFR-derived coastal upwelling index (see Lorente et al. 2020 for further details) that could be useful for a broad variety of end-users dealing with marine resources, water quality, fisheries and aquaculture production. Since this is a work in progress, we consider that it is not convenient to be mentioned explicitly in the manuscript.

With regards to SASEMAR, this agency is among the most significant end-users of reliable met-ocean information in Spain and it has played a key role in the development of the IBISAR service. SASEMAR acknowledges the efforts made in the context of IBISAR to advance towards the development of ocean model skill assessment services, addressing one of their overarching concerns: the accuracy of the predictions.

We have explained a little bit more on SASEMAR at the end of section 5.1.:

*“SASEMAR oversees maritime traffic control, SAR operations, marine environmental protection and training in Spain. In this context, HFR estimations are readily ingested by the Environmental Data Server (EDS) managed by SASEMAR to enhance the emergency planning process for a prompt response.”*

Reference:

Lorente, P.; Piedracoba, S.; Montero, P.; Sotillo, M.G.; Ruiz, M.I.; Álvarez-Fanjul, E. Comparative Analysis of Summer Upwelling and Downwelling Events in NW Spain: A Model-Observations Approach. *Remote Sens.* 2020, 12, 2762. <https://doi.org/10.3390/rs12172762>

## **TECHNICAL COMMENTS**

**Line 53 Can the authors expand on what they mean by Mediterranean framework, do they mean region? If not please expand and clarify**

Not only the region but also a wealth of inherent factors associated with this marginal sea. We wanted to mean the supporting observational structure, budget, scientific and societal priorities along with specific handicaps and environmental threats in the Mediterranean waters that are used to ultimately define the strategy and roadmap of the MONGOOS HFR team.

We have expanded on what we wanted to mean by Mediterranean framework at the end of section 1.6, not in line 53 since we would like to keep the abstract short and concise.

*“In this context, the Mediterranean framework should be understood as the ocean observational infrastructure already implemented together with a range of thematic areas (gaps, resources, dilemmas, strategic issues, etc.) that inherently shape coordinated efforts and the future roadmap of the MONGOOS HFR team.”*

**Line 58 what is meant by a restless navigable route**

We wanted to highlight the significantly high number of ships navigating across the Mediterranean since ancient times. We have replaced “restless” by “busy” to avoid any misunderstanding.

**Line 60 remove the “such as”, there are only 3 chokepoints just state the 3**

Done.

**Line 63 can the biological productivity be mapped in Figure 1 rather than bathymetry?**

Yes, mass concentration of chlorophyll-a (CHL-a) in sea water can be mapped as a proxy of primary productivity. However, we would prefer to keep the bathymetry map to highlight that HFR systems are coastal platforms.

A map of concentration of CHL-a (expressed in mg/m<sup>3</sup>), derived from a 2-year (2020-2021) satellite dataset from the Copernicus Marine Service is provided below. As stated in the manuscript, offshore waters exhibit extremely low biological productivity, with the concentration of nutrients decreasing from NW to SE.

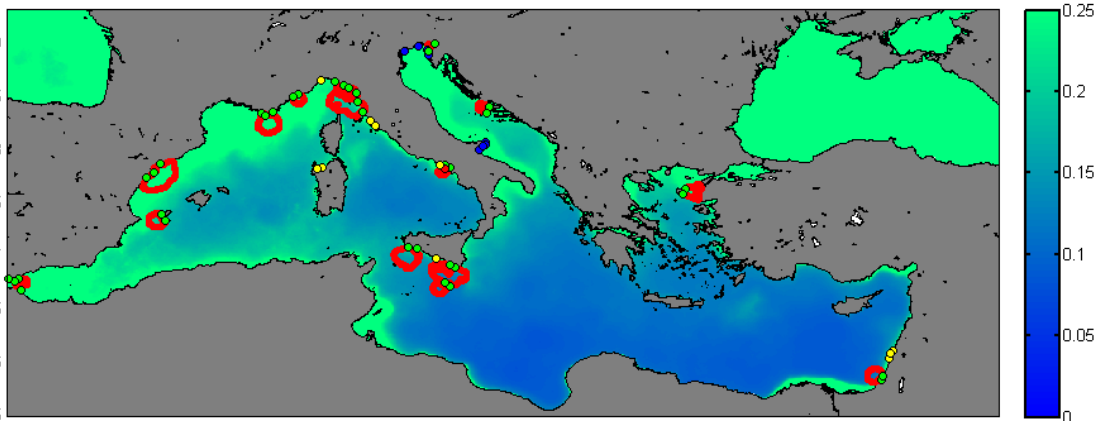

This map could be added to Figure 1 as a second panel (b), we leave it to the discretion of the anonymous reviewer.

**Line 75** It is hard to see the dots representing the HFR stations, can they be made larger?

Figure 1 has been remade to enhance the visibility of the dots.

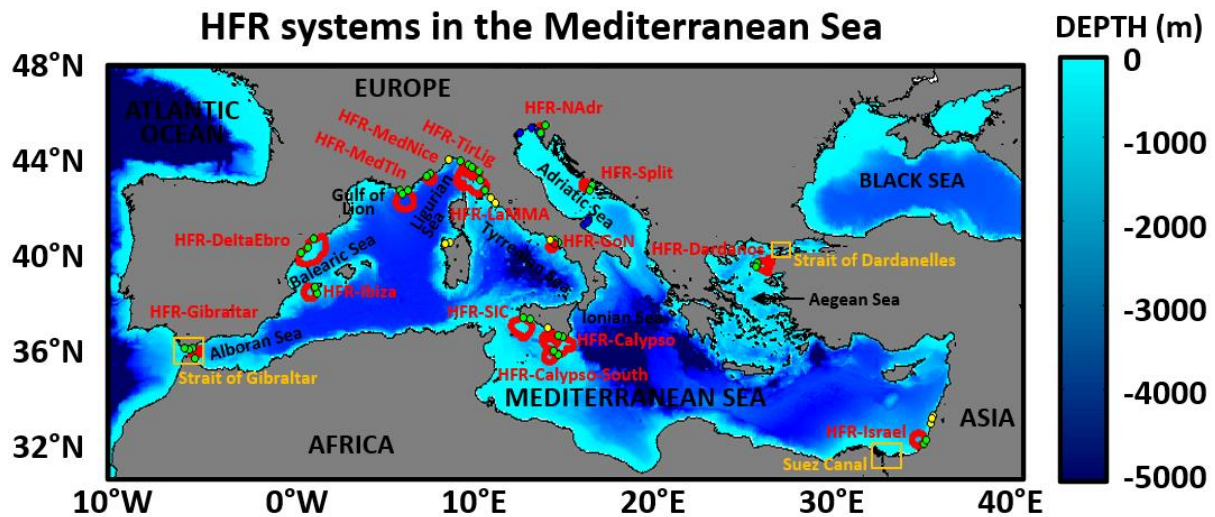

**Line 79** 7% of the worlds biodiversity while only covering 0.7% of the ocean’s surface area

Included in the text.

**Line 90** “impact assessment” can the authors expand upon this phrase?

We have added a sentence to better clarify the concept of “impact assessment”:

*“In this context, impact assessment should be understood as the analysis of the primary metocean factors that give rise to severe coastal disasters and the comprehensive evaluation of the environmental effects on marine resources along with other inherent societal and economic consequences with the final aim of implementing strategic preparedness policies that could reduce both exposure and coastal vulnerability.”*

**Line 99 470 million**

Done!

**Line 105 enhanced maritime safety and improved ecological decision support sounds like US IOOS challenges. Are these challenges documented in Europe as well?**

Yes, maritime safety is a challenge also in Europe, particularly in the Mediterranean Sea as it is one of the world's busiest shipping lanes of oil and gas tankers, container vessels and ships. Furthermore, the recent exploration and exploitation of the hydrocarbons in the Eastern Mediterranean Levantine Basin (Tintoré et al., 2019) involves a higher risk of marine oil pollution. The development of ecological decision support systems has also been prioritised in the context of RADMED monitoring programme (López-Jurado et al., 2015).

Some modifications have been introduced in the manuscript:

*“other interconnected societal challenges in the Mediterranean Sea have been documented (Tintoré et al., 2019; López-Jurado et al., 2015) and include:”*

References:

Tintoré, J., Pinardi, N., Álvarez-Fanjul, E. et al.: Challenges for Sustained Observing and Forecasting Systems in the Mediterranean Sea, *Front. Mar. Sci.*, 6, 568, 2019.

López-Jurado, J. L., Balbín, R., Alemany, F., Amengual, B., Aparicio-González, A., Fernández de Puellas, M. L., García-Martínez, M. C., Gazá, M., Jansá, J., Morillas-Kieffer, A., Moyá, F., Santiago, R., Serra, M., and Vargas-Yáñez, M.: The RADMED monitoring programme as a tool for MSFD implementation: towards an ecosystem-based approach, *Ocean Sci.*, 11, 897–908, <https://doi.org/10.5194/os-11-897-2015>, 2015.

**Line 110 remains a priority**

Done.

**Line 124 for societal benefit**

Done.

**Line 125 can you add a sentence joining this paragraph with the previous eg “For instance, two programs that contribute to the wealth of data collected in the Med include SMOS and ARGO.”**

Done.

**Line 134 areal and endurance coverage**

Included in the text.

**Line 136 thereby providing**

Done.

**Line 157 the title of the section is Mediterranean Oceanographic Network, line 185 uses the term Mediterranean observing system. Any significance in the difference in terms?**

No, there is no difference between both terms. Since the acronym MONGOOS stands for “Mediterranean Oceanography Network for Global Ocean Observing System”, we have changed (for consistency reasons):

- 1) “Mediterranean observing system” by “Mediterranean oceanography network” in line 185
- 2) “Mediterranean oceanographic network” by “Mediterranean oceanography network” in the title of the section 1.5

**Line 166 what is meant by boots?**

It is a typo: “boots” has been replaced by “boosts”

**Line 183 Should that read MONGOOS HFR Network?**

No, it should not. The entire MONGOOS network includes 3 different sub-groups: 1) observations, 2) modelling tools and 3) applications. The MONGOOS HFR network is a specific component inside sub-group 1 (observations).

**Figure 2 what is the meaning of the double-sided arrow between MONGOOS and Med HFR working group?**

We wanted to mean that there is a two-way interaction between both elements. On one hand, MONGOOS sets the objectives and the strategy for its three main components (Observation, Modelling and Application working groups) and specific subgroups. On the other hand, the Mediterranean HFR working group, as a subgroup, provides data and feedback to better define the strategy (also contributing to carry out the specific actions at regional level), always aligned with the general roadmap established by the EuroGOOS HFR Task Team.

A piece of text has been added to the caption of Figure 2:

*“The double-sided arrow between MONGOOS and the Mediterranean HFR working group intends to highlight the two-way interaction existing between both entities: the former sets specific tasks and the general strategy, while the latter provides data and support to update the predefined roadmap.”*

**Line 186 coastal observing systems should not be capitalized**

OK, modified.

**Line 211 consider removing “not only” and “but also”**

Done.

**Line 240 remove “on”**

Done.

**Line 241 add “the Geometric Dilution...”**

Added “the”.

**Line 250 remove very**

Done.

**Line 253 meaning of ADC?**

The acronym ADC stands for “analog-to-digital converter”, as it has been included in the text.

**Line 290 change to ionospheric**

Done.

**Line 300 For this section would you consider a figure like this**

Many thanks to the reviewer for the recommendation but we would rather prefer to focus on differentiating the two major types of HFR systems (e.g. Beam Forming -BF- and Direction Finding -DF-) without referring to brands or specific private companies. Indeed, the first version of the draft included a table rather similar to the proposed one. Then we decided to remove any mention of the commercial brands (whose representatives are included as coauthors of this manuscript) to avoid any potential conflict of interests between them.

|                     | <b>Beam Forming</b> | <b>Direction Finding</b> |
|---------------------|---------------------|--------------------------|
| <b>Phased Array</b> | <b>WERA</b>         | <b>WERA</b>              |
| <b>Compact ?</b>    | <b>?</b>            | <b>CODAR SeaSonde</b>    |

**Line 319 directions of arrival**

Done.

**Line 321 consider this as a good reference for this sentence**

**B. M. Emery, "Evaluation of Alternative Direction-of-Arrival Methods for Oceanographic HF Radars," in IEEE Journal of Oceanic Engineering, vol. 45, no. 3, pp. 990-1003, July 2020, doi:10.1109/JOE.2019.2914537.**

Reference added.

**Line 322 consider using phased-array rather than extended arrays**

Done.

**Line 323 what is meant by “peaky”? Can a better term be used or more explanation given?**

We wanted to mean the opposite of smooth. Maybe “irregular” aspect could be more convenient, as indicated in the text.

**Line 324 remove very**

Done.

**Line 325 remove careful**

Done.

**Figure 3 do the plots cover the same period?**

Yes, both are a snapshot corresponding to September 1st, 2020, 06:00 UTC, as stated in the caption.

**Figure 4b remove x axis 45-180 degrees and wrap 0-45 next to 360. The resolution of the figure is poor, increase it.**

Done. See below the new Figure 4:

a) Ebro Delta HFR system

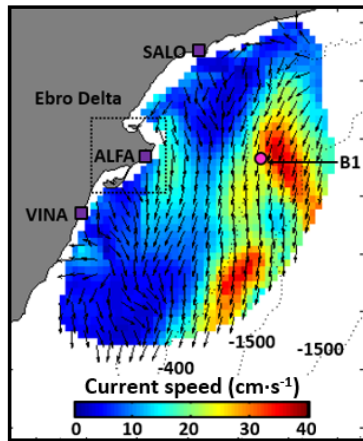

b) Validation of SALO radial current data

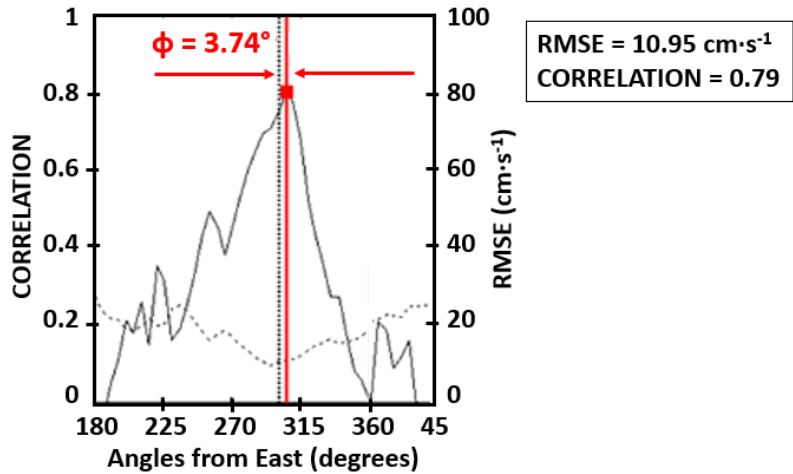

c) Validation of total current measurements

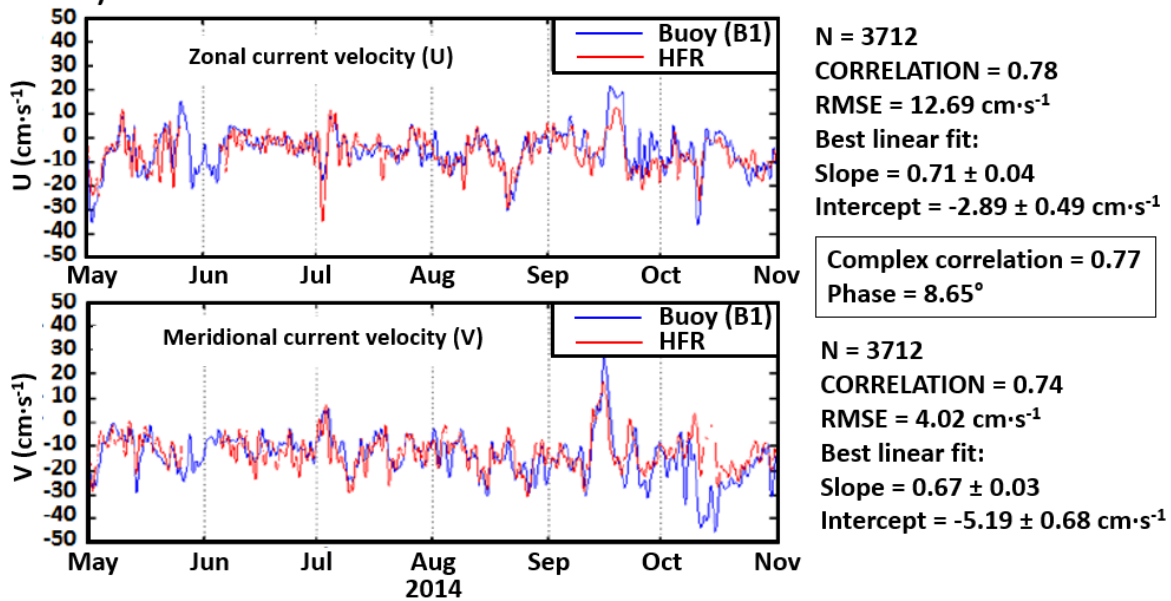

### Line 390 Lagrangian

Done.

### Line 399 please provide reference for these statistics

Added: “Cosoli et al., 2010; Berta et al., 2014; Lorente et al., 2014, 2015 and 2021; Corgnati et al., 2019a; Lana et al., 2016; Kalampokis et al., 2016; Capodici et al., 2019; Guérin et al., 2021, Molcard et al., 2009; Bellomo et al., 2015”

### Line 407 have also been documented

Done.



**Line 408 please provide a summary sentence or paragraph on this section, introducing the next section**

The following paragraph has been added:

*“Once HFR has proved to be a valid instrument to accurately monitor surface currents with high spatio-temporal resolution over wide coastal areas, the ability of this remote-sensing technology to measure waves and wind direction must also be assessed, as detailed in the next two sections.”*

**Line 445 new paragraph after reference**

Done.

**Line 453 asset**

Done.

**Line 489 what is Mc-WAF?**

The McWaf system, operating in ISPRA since 2012, provides sea state forecasts over the Mediterranean Sea and over selected Italian regional and coastal areas (Orasi et al., 2018).

A sentence has been added to the manuscript to clarify this point.

**Line 490 please explain intermediate rings more**

In the case of CODAR systems, HFR wave data are retrieved from a number of individual range rings, which extend radially from an origin at the onshore radar site to a certain distance offshore. Therefore, intermediate rings are those placed at intermediate distances from the coast, nor the first one (closest to the HFR site) nor the outermost range ring. This has been clarified in the text.

**Line 515 location-specific**

Done.

**Figure 5 missing x axis tick marks on the figures, standardize the colors HFR is red, buoy blue, other black. Fig 5d is faint.**

Corrected. See below the new Figure 5:

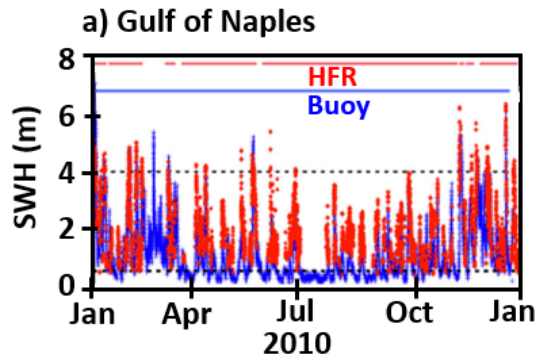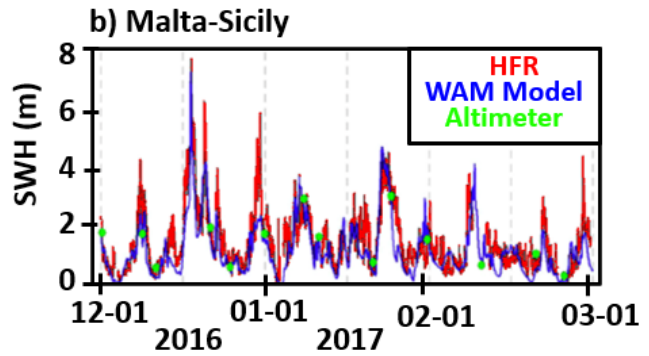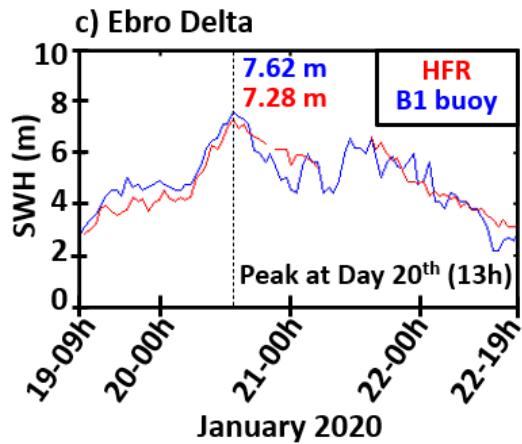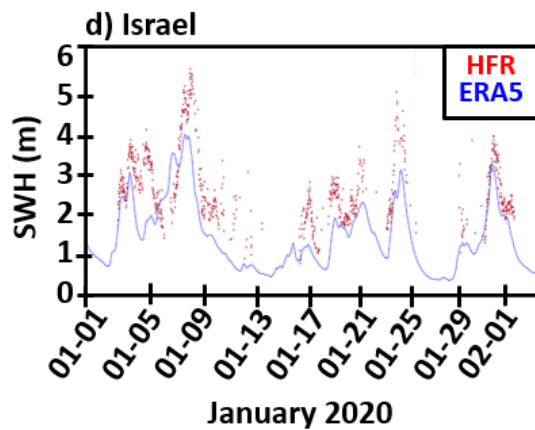

**Line 537** please provide a summary sentence or paragraph on this section, introducing the next section

We consider this suggestion already solved in response to the reviewer's request in line 408.

**Line 553** remove also

Done.

**Line 557** why is this sentence needed?

Removed from the manuscript.

**Line 570** provided

Done.

**Line 572** showed that

Done.

**Line 576** should tense be past, showed comparisons

Done.

Line 585 and iii) other

Done.

Figure 6 cc should be subscript to match figure. What is the red dashed line in subplot a?

Corrected. The red dashed line shows the circular correlation coefficient threshold (0.5), since values of  $\rho_{cc} > 0.5$  indicate a reasonable correlation between the measurements (Saviano et al., 2021). A clarification has been added to the caption of Figure 6.

See below the new Figure 6:

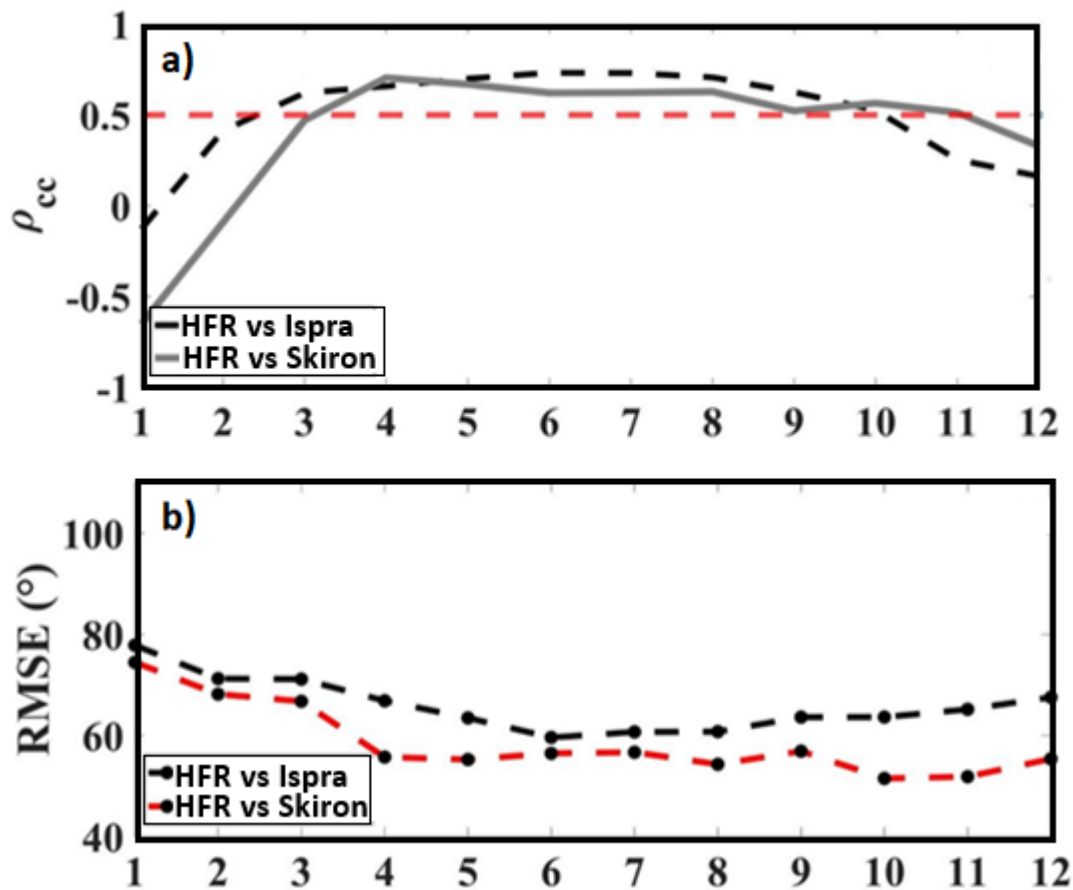

The RMSE of 60 degrees seems high, please explain.

Although the RMSE values for wind direction recorded in the Gulf of Naples (SW Italy) seem to be high, they are in line with similar experiments carried out previously in the Mediterranean Sea (Shen and Gurgel, 2018). The limitations in wind retrieval in this study (performed in Saviano et al., 2021) for direction-finding HFR are comparable to those reported for beam forming systems in the Ligurian Sea (NW Italy) under similar atmospheric conditions (Shen and Gurgel, 2018).

In the Table attached below (extracted from Shen and Gurgel, 2018), it can be observed that the RMSE emerged in the range 20-84 cm/s, with lower RMSE values obtained when the wind speed is higher, in accordance with the results exposed by Saviano et al. (2021)

**Table 5.** Comparison of the RMS error of the wind direction related to wind speed using the pattern-fitting and LSM methods in the Ligurian Sea experiment.

| RMS Error for Wind Direction Measurements (°) |                  |                        |                 |          |
|-----------------------------------------------|------------------|------------------------|-----------------|----------|
| Comparison of inversion method                | Wind speed (m/s) | Wind speed range (m/s) |                 |          |
|                                               | $U > 3$          | $0 < U \leq 3$         | $3 < U \leq 10$ | $U > 10$ |
| Pattern-fitting method                        | 57.2             | 80.3                   | 57.6            | 20.4     |
| LSM method                                    | 65.1             | 84.6                   | 64.7            | 24.1     |

The results show that several factors contribute to the accuracy of HFR wind measurements, the operational frequency being the most relevant one. When the radar operates at higher frequencies, the resonant Bragg waves have a shorter wavelength being more sensitive to changes in the wind field. Therefore, a HFR with a higher operating frequency leads to estimations that are in better agreement with in-situ measurements. Another important factor is wind speed. Different studies comparing HFR and in-situ measurements concluded that the retrieval of the wind direction is not reliable under wind speeds below 5 m/s (Lipa et al., 2014).

In the case of Saviano et al (2021), there are other critical physical effects, such as wind duration and fetch, the assumption of direction homogeneity along the range cells, or the adjustment of wind measurement from 10 m above mean sea level to sea surface, that should be included in the evaluation of the radar inversion performance

In conclusion, we have added a paragraph to the text in order to better clarify why the RMSE values here obtained are higher than those obtained from the comparison of other HFR-derived parameters like sea surface currents or the significant wave height:

*“Although the RMSE values obtained for wind direction in the GoN appear to be high, they are in line with similar experiments carried out previously in the Mediterranean Sea (Shen and Gurgel, 2018). Detected differences could be, in part, attributed to a number of relevant elements such as: (i) sensors’ limitations (and the related instrumental noise); (ii) mismatch in the horizontal sampling (whereas direction homogeneity along the HFR range cells is assumed, in-situ instruments provide point measurements); (iii) vertical mismatch (adjustment of wind measurement from 10 m above mean sea level to sea surface). Other physical effects such as the wind duration and fetch should also be included in the evaluation of the HFR inversion performance.”*

References:

- Shen, W.; Gurgel, K.-W. Wind direction inversion from narrow-beam HF Radar backscatter signals in low and high wind conditions at different radar frequencies. *Remote. Sens.* 2018, 10, 1480.
- Lipa, B.; Barrick, D.; Alonso-Martirena, A.; Fernandes, M.; Ferrer, M.I.; Nyden, B. Brahan project high frequency radar ocean measurements: Currents, winds, waves and their interactions. *Remote. Sens.* 2014, 6, 12094–12117.

**Line 599** replace know-how with operational experience

Done.

**Line 600** replace minor with reduced

Done.

**Line 605 Is Med HFR group working with Ocean Best Practices <https://www.oceanbestpractices.org> ?**

Yes, it is. Scientists, technicians and operators from several Mediterranean institutions contribute to the development of OBPs in the context of different projects (e.g. JericoNEXT, JericoS3, EuroSea, etc). Indeed, by introducing the keywords "Mediterranean HF radar" in the Searching area of the OBP repository, the reviewer will be able to access documentation provided by many of the co-authors of this manuscript.

To our knowledge, the next upload will be in March, concerning a "Data Management Best practises report for physical mature platforms", being developed in the context of the Jerico-S3 project.

The following paragraph has been added to the text:

*“In this context, it is worth mentioning that the Mediterranean HFR community is also actively working with Ocean Best Practices (<https://www.oceanbestpractices.org>), a global, sustained system comprising technological solutions and community approaches to enhance management of methods as well as support the development of ocean best practices.”*

**Line 608 does the numbering in the list denote a hierarchy? if not replace with symbols.**

Replaced with symbols.

**Line 617 is there a reference for the EuroGOOS HFR Task Team?**

There is a website: <https://eurogoos.eu/high-frequency-radar-task-team/>

One reference, available at <https://hal.archives-ouvertes.fr/hal-03328829/>, has been added:

Lorenzo Corgnati, Carlo Mantovani, Anna Rubio, Emma Reyes, Paz Rotllan, et al.. the eurogoos high frequency radar task team: a success story of collaboration to be kept alive and made growing. 9th EuroGOOS International conference, Shom; Ifremer; EuroGOOS AISBL, May 2021, Brest, France. pp.467-474.

**Line 622 consider removing “for the development of operational ocean monitoring via HFR systems”**

Done.

**Line 625 spell out EU, is there a reference for JERICO-NEXT?**

Done. Although there is no reference for JERICO-NEXT, there is a web link that has been added to the text: <https://www.jerico-ri.eu/previous-project/jerico-next/>

**Line 627 replace within with “with”**

Done.

**Line 631 which set the basis**

Done.

**Line 635 remove “the achievement of”**

Done.

**Line 637 can the authors comment how the European standard format compares to the American standard? Are there any differences?**

The paragraph has been moved to sections 2.5 and 2.6, following reviewer 2 suggestion.

The European common data and metadata model for NRT data has been implemented according to the standards of Open Geospatial Consortium (OGC) for access and delivery of geospatial data, and compliant with the Climate and Forecast Metadata Convention CF-1.6, to the Unidata NetCDF Attribute Convention for Data Discovery (ACDD), to the OceanSITES convention and to the INSPIRE directive.

Furthermore, it has been defined following the guidelines of the DATAMEQ working group and it fulfils the recommendations given by the Radiowave Operators Working Group (ROWG).

To enforce semantics and interoperability, controlled vocabularies are used in the model for variable short names and standard names.

The model specifies the file format (i.e. netCDF-4 classic model), the global attribute scheme, the dimensions, the coordinate, data and Quality Control (QC) variables and their syntax, the QC procedures and the flagging policy for both radial and total data.

However, discrepancies have been found between the European and the US common data and metadata format regarding: i) variables names and syntax (e.g. LONGITUDE; LATITUDE; EQCT; NSCTM GDOP in Europe vs. lon, lat, u, v, DOPx, DOPy in US ); ii) dimensions and coordinates (e.g. TIME:units = "days since 1950-01-01T00:00:00Z" in Europe vs. time:units = "seconds since 1970-01-01" in US); iii) global attributes (different or missing mandatory ones).

A piece of text has been added to the text to clarify this point:

*“Some discrepancies have been found between the European and the US common data and metadata format regarding: i) variables names and syntax; ii) dimensions and time coordinates; iii) global attributes (different or missing mandatory ones).”*

**Line 638 spell out or explain SDC and INSPIRE**

Done. SDC and INSPIRE stand for “supplemental digital content” and “infrastructure for spatial information in Europe”, respectively. The paragraph has been moved to sections 2.5 and 2.6, following reviewer 2 suggestion.

**Line 639 replace “to be mandatorily” with “are consistently applied to HFR data as defined by the EuroGOOS”**

Done.

**Line 646 is there a link for the EU HFR Node that can be provided**

We have added the following link:

*“The EU HFR Node (Fig. 7) was established in 2018 by AZTI, CNR-ISMAR and SOCIB, under the coordination of the EuroGOOS HFR Task Team (Rubio et al., 2017), as the focal point and operational asset in Europe for HFR data management and dissemination ([http://150.145.136.27:8080/thredds/HF\\_RADAR/HFRadar\\_catalog.html](http://150.145.136.27:8080/thredds/HF_RADAR/HFRadar_catalog.html)) by promoting networking between EU infrastructures, marine data portals and the Global HFR network.”*

**Line 660 can anything be said about data users, statistics on data use?**

We are still unable to provide the usage metrics at regional level. CMEMS InSitu TAC (one of the main European marine data portals providing standard surface currents derived from HFR) is working on the providers catalogue where every data provider will be able to check the number of users per platform. A virtual access metric system is also being developed in the context of Jerico S3 project and some of the data providers are already generating metrics on HFR data usage, but not at regional level.

**Line 668 does this rule apply to only HFR or all ocean measurements? please explain**

Only to HFR measurements, as indicated now in the text. This was the rule established by the European HFR node, considering that the implementation of the standards can often be beyond the technical capabilities of many scientific communities and, if not, these time-demanding tasks are usually carried out on a voluntary basis from the data provider, being typically funded by science activities.

**Line 697 should the items in the list be capitalised?**

Not really, items changed.

**Line 740 replace inexistent with nonexistent**

Done.

**Line 745 replace Served as with For**

Done.

**Table 2 spell out PdE and MIO, consider adding a column for the country and removing country from the Institution column. Should there be an order for the table? Alphabetical by country? frequency? Authors can decide.**

Done. A new column has been inserted into the table. The elements of the table have been ordered by frequency.

**Figure 8c should Phased array be replaced with beam forming if comparing to direction finding?**

Corrected. See below the new Figure 8:

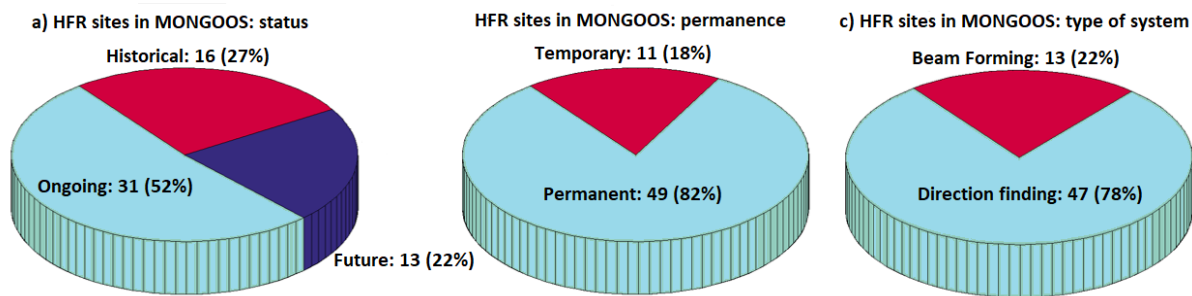

**Figure 9b the 14(23%) is cutoff at the bottom, please correct**

Corrected. See below the new Figure 9:

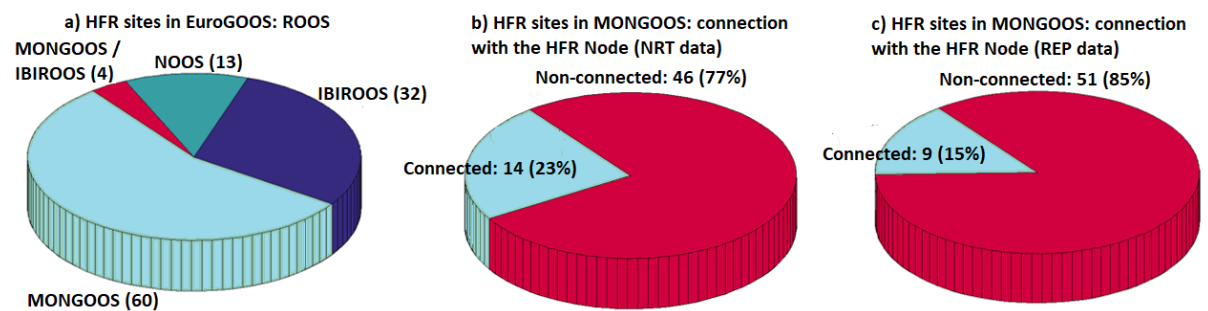

**Line 785 serve the marine industry**

Done.

**Table 3 INTERREG is mentioned often, can this be explained.**

Yes, it has been explained in the text (as Table 3 has been replaced by a Gantt diagram, following the reviewer's advice):

*“Interreg programmes are European Territorial Cooperation programmes, designed to promote cooperation between member states on shared challenges and opportunities.”*

**Would the authors consider replacing the table with a Gantt chart to show the information?<https://pythonawesome.com/a-convenient-but-aesthetic-way-of-creating-agantt-chart-with-python/>**

Of course, we are willing to replace Table 3 with a Gantt chart, which is a user-friendly way to summarise the timeline of the projects focused on HFR technology in the Mediterranean.

To this aim, the information about the funding body has been moved to the section where the projects are thoroughly described, while the web links have been inserted into the Gantt diagram (new Figure 10, attached below), which contains the official logo of each project along with the temporal period covered by them.



| PROJECT                                                                             | 2010                         | 2011    | 2012 | 2013                                                              | 2014                                                                                                             | 2015 | 2016 | 2017                                                                                       | 2018                                                                                                                                                | 2019 | 2020 | 2021 | 2022 | 2023 |
|-------------------------------------------------------------------------------------|------------------------------|---------|------|-------------------------------------------------------------------|------------------------------------------------------------------------------------------------------------------|------|------|--------------------------------------------------------------------------------------------|-----------------------------------------------------------------------------------------------------------------------------------------------------|------|------|------|------|------|
|    | (There is no active website) |         |      |                                                                   |                                                                                                                  |      |      |                                                                                            |                                                                                                                                                     |      |      |      |      |      |
|    | (There is no active website) |         |      |                                                                   |                                                                                                                  |      |      |                                                                                            |                                                                                                                                                     |      |      |      |      |      |
|    |                              |         |      | <a href="http://www.ritmare.it/en">www.ritmare.it/en</a>          |                                                                                                                  |      |      |                                                                                            |                                                                                                                                                     |      |      |      |      |      |
|    |                              |         |      | <a href="https://www.hazadr.eu">https://www.hazadr.eu</a>         |                                                                                                                  |      |      |                                                                                            |                                                                                                                                                     |      |      |      |      |      |
|    |                              |         |      | <a href="http://www.izor.hr/neural">http://www.izor.hr/neural</a> |                                                                                                                  |      |      |                                                                                            |                                                                                                                                                     |      |      |      |      |      |
|    |                              |         |      |                                                                   | <a href="http://www.jerico-ri.eu/previous-project/jerico-next">www.jerico-ri.eu/previous-project/jerico-next</a> |      |      |                                                                                            |                                                                                                                                                     |      |      |      |      |      |
|    |                              |         |      |                                                                   |                                                                                                                  |      |      | <a href="http://www.impact-maritime.eu/en/project/">www.impact-maritime.eu/en/project/</a> |                                                                                                                                                     |      |      |      |      |      |
|    |                              |         |      |                                                                   |                                                                                                                  |      |      |                                                                                            | <a href="http://www.ibisar.es">www.ibisar.es</a>                                                                                                    |      |      |      |      |      |
|    |                              |         |      |                                                                   |                                                                                                                  |      |      |                                                                                            | <a href="http://www.interreg-maritime.eu/it/web/sicomarplus">www.interreg-maritime.eu/it/web/sicomarplus</a>                                        |      |      |      |      |      |
|  |                              | Calypso |      |                                                                   | Calypso-Follow On                                                                                                |      |      |                                                                                            | <a href="https://www.calypsosouth.eu/">https://www.calypsosouth.eu/</a>                                                                             |      |      |      |      |      |
|  |                              |         |      |                                                                   |                                                                                                                  |      |      |                                                                                            | <a href="http://www.lamma.rete.toscana.it/en/progetti/sinapsi">www.lamma.rete.toscana.it/en/progetti/sinapsi</a>                                    |      |      |      |      |      |
|  |                              |         |      |                                                                   |                                                                                                                  |      |      |                                                                                            | <a href="http://governance.interreg-med.eu/">http://governance.interreg-med.eu/</a>                                                                 |      |      |      |      |      |
|  |                              |         |      |                                                                   |                                                                                                                  |      |      |                                                                                            | <a href="https://sharemed.interreg-med.eu/">https://sharemed.interreg-med.eu/</a>                                                                   |      |      |      |      |      |
|  |                              |         |      |                                                                   |                                                                                                                  |      |      |                                                                                            | <a href="http://www.eurosea.eu">www.eurosea.eu</a>                                                                                                  |      |      |      |      |      |
| <b>i-WaveNET</b>                                                                    |                              |         |      |                                                                   |                                                                                                                  |      |      |                                                                                            | <a href="https://italiamalta.eu/progetti/funded-projects/i-wavenet/?lang=en">https://italiamalta.eu/progetti/funded-projects/i-wavenet/?lang=en</a> |      |      |      |      |      |

Line 792 the first two project have the acronym explained in the title, the remaining ones do not. Please be consistent.

Fully agree. The acronyms have been explained in the main body of the manuscript, not in the title.

Line 840 remove “which are also” and “in this section”

Removed.

Line 850 The project’s overall objective was

Corrected.

**Line 890 in title it is CALYPSO-FollowOn, on the next line the – is missing? Also missing years of the project**

Corrected.

**Line 910 can you add a summary sentence or paragraph on this section, something to tie together all the projects?**

Done. A summary paragraph has been added:

*“In conclusion, the last 10-15 years have witnessed the significant increase of national and cross-border projects in the Mediterranean Sea (Fig. 10) whose main scope was (and still is) to consolidate the HFR as an efficient coastal ocean monitoring technology. Most of the projects are funded by the European Commission in the framework of different Interreg programs, by the EU’s H2020 Research and Innovation and by national research programs. In particular, 2020 has been a key year in terms of wealth of initiatives carried out simultaneously (9). A relevant number of new HFR sites have been recently deployed and integrated into multi-platform observatories, providing quality-controlled data that are routinely delivered to a broad audience and subsequently used for diverse marine applications, among others: maritime safety, oil spill accidents or SAR operations (TOSCA, HAZADR, IBISAR, SICOMARplus, CALYPSO, PANORAMED, SHAREMED, i-WaveNET), port and harbor security (SINAPSI), risk prevention and coastal management (TRADE), as well as marine spatial planning and integrated coastal zone management (RITMARE, IMPACT).”*

**Line 913 Equal to other**

Done.

**Line 915 remove “not only”**

Done.

**Line 916 move “strengths, weaknesses, opportunities and threats” to beginning of sentence. remove potential.**

Done

**Line 920 pursuit of permanent funding like those of other programs?**

We have expanded the sentence:

*“the pursuit of permanent funding (thanks to Interreg programs like SICOMAR-Plus or CALYPSO) to extend the network at both national and regional scales for better cross-border coverage.”*

**Line 930 what kind of licenses? radio frequency? equipment installation? please state**

Clarified in the text: “*licences to source site permissions, site access, transmit licences and use of the data (Mantovani et al., 2020).*”

**Line 950 For this paragraph, is this process happening for other measurements? if so please list.**

We guess so, but do not have specific information about other observational platforms in the Mediterranean Sea. We are aware that, in the case of the Copernicus Marine Service (CMEMS), some Monitoring and Forecasting centres (MFCs) have delivered new 3D hourly forecast products (of physical variables like temperature, salinity and currents) as a result of the strong demand from a variety of end-users and intermediate-users that want to nest their coastal models into the CMEMS regional models. Previously, only daily means were available for the entire water column and the dynamical nesting was not so consistent.

We are not sure about the convenience of mentioning here the bidirectional commitment in CMEMS, but are open to include it in the manuscript if the reviewer wants so.

**Line 957 replace happy-ending with success**

Done.

**Line 969 Additionally pilot**

Done.

**Line 982 to mitigate noise and clutter**

Done.

**Line 988 can easily be detected, triggering alerts for operators**

Done.

**Line 989 spell out AIS, reference [https://hfradar.msi.ucsb.edu/brian-emery/files/reports/2013\\_sbir\\_phase2\\_final\\_report.pdf](https://hfradar.msi.ucsb.edu/brian-emery/files/reports/2013_sbir_phase2_final_report.pdf)**

The acronym AIS stands for “Automatic Identification System”. Added to the text along with the reference Whelan et al. (2013):

Whelan, C., Teague, C., Barrick, D., Emery, B. and Washburn, L.: HF Radar Calibration with Automatic Identification System Ships of Opportunity, Phase II Final Report, NOAA SBIR, Silver Spring, MD, USA, 2013.

**Line 1016 replace “keep down” with “reduce”**

Done.

**Line 1046 remove very**

Done.

**Line 1084 replace “build-up” with utilize**

Done.

**Line 1085 what is meant by first order, can this be further explained?**

We intended to highlight that it is of the greatest importance, significance, or magnitude. We have replaced “first-order” by “significant” to avoid any misunderstanding.

**Line 1092 examples illustrated here might**

We have provided an illustrative example: “such as the HFR network operating in Asia, presented at the 1st Ocean Radar Conference for Asia (ORCA) (Fujii et al., 2013)”.

Where the reference is:

Fujii, S., Heron, M.L., Kim, K., Lai, J.W., Lee, S.H., Wu, X., Wyatt, L.R. and Yang, W.C: An overview of developments and applications of oceanographic radar networks in Asia and oceania countries, Ocean Science Journal, 48 (1), 69-97, 2013.
